# Supplementary material for: Study on the Properties and Synergistic Antioxidant Effects of Novel Bifunctional Fusion Proteins Expressed Using the UTuT6 System
Source: MDPI journal article supplement (doi:10.3390/antiox12091766), 2023-09-14
Supplement: s1 [file s1]

# Supplementary information

## **Study on the properties and synergistic antioxidant effects of novel bifunctional fusion proteins expressed using the UTuT6 system**

**Qi Yan<sup>1</sup>; Jingyan Wei<sup>1,2,3, \*</sup>; Junxia Song<sup>1</sup>; Mengna Li<sup>1</sup>; Xin Guan<sup>1, \*</sup>;**

**Jian Song<sup>4, \*</sup>**

<sup>1</sup> College of Pharmaceutical Science, Jilin University, Changchun, 130021, P. R. China.

<sup>2</sup> Key Laboratory for Molecular Enzymology and Engineering of the Ministry of Education, Jilin University, Changchun, 130000, P. R. China.

<sup>3</sup> Institute of Theoretical Chemistry, Jilin University, 130023 Changchun, PR China.

<sup>4</sup> School of microelectronics, Shanghai University, Shanghai, 201800, China

**\*The corresponding authors:**

E-mail address: jsong@shu.edu.cn (J. S); weijy@jlu.edu.cn (J. W); guan@jlu.edu.cn(X. G).

## Supplementary Results

### 1. Supplementary tables

**Table S1: Primer sequences used for Se-hGPx<sub>UAG</sub> fusion proteins cloning.**

| <i>Primers</i>                      | <i>Sequences 5'→3'</i>                                       |
|-------------------------------------|--------------------------------------------------------------|
| hGPx1-BamHI-F                       | CGCGGATCCGATGTGTGCTGCTC                                      |
| hGPx1 <sub>UAG</sub> -linker-R      | GAGCCACCTCCGCCTGAACCGCCTCCACCGGCACAGCT<br>GGGCCCTTG          |
| hGPx1 <sub>UAG</sub> -long linker-R | CCGCCTGAACCGCCTCCACCAGATCCACCGCCAC<br>CGGAGGCACAGCTGGGCCCTTG |
| linker-SOD3-72P-F                   | CGGAGGTGGCTCAGGCGGTGGCGGCTCACACGTTCA<br>CCAGTTCG             |
| SOD3-72P-HindIII-R                  | CCCAAGCTTTTAGTCTTCACCAGC                                     |
| SOD3-72P-BamHI-F                    | CGGGATCCCACGTTACACGTTTCG                                     |
| hGPx4-EcoRI-F                       | CCGGAATTCGATGTGTGCTGCTC                                      |
| hGPx4 <sub>UAG</sub> -linker-R      | GAGCCACCTCCGCCTGAACCGCCTCCACCGAAATAGTGG<br>GGCA              |
| hGPx4 <sub>UAG</sub> -long linker-R | CCGCCTGAACCGCCTCCACCAGATCCACCGCCAC<br>CGGAGAAATAGTGGGGCA     |

Gene accession number used in this study shown below: GPx1: NM\_000581; GPx4: NM\_001367832; SOD3: NM\_003102.

**Table S2: Primer sequences used for Se-hGPx4<sub>UAG</sub> fusion protein mutation.**

| <i>Primers</i>   | <i>Sequences 5'→3'</i>                                 |
|------------------|--------------------------------------------------------|
| GPx4-C2S-NdeI-F  | GGGAATTCCATATGTGCGCGTCC                                |
| GPx4-C10S-NdeI-F | GGGAATTCCATATGTGCGCGTCCCGGGACGACTGGCGCTCGG<br>CGCGCTCC |
| GPx4-C37S-F      | GGCTTCGTGTCGATCGTCACC                                  |
| GPx4-C37S-R      | GGTGACGATCGACACGAAGCC                                  |
| GPx4-C66S-F      | ACGCTGAGTCGGGTTTGCGG                                   |
| GPx4-C66S-R      | CCGCAAACCCGACTCAGCGT                                   |

|              |                               |
|--------------|-------------------------------|
| GPx4-C75S-F  | CCTTCCCGTCGAACCAGTT           |
| GPx4-C75S-R  | AACTGGTTCGACGGGAAGG           |
| GPx4-C107S-F | CAGCAAGATCTCGGTGAACGGGG       |
| GPx4-C107S-R | CCCCGTTACCGAGATCTTGCTG        |
| GPx4-C148S-F | CGACAAGAACGGCTCGGTGGTGAAGCGCT |
| GPx4-C148S-R | AGCGCTTCACCACCGAGCCGTTCTTGTCG |

**Table S3: Thiol content of Se-hGPx4<sub>UAG</sub> / Se-hGPx4<sub>UAG</sub>-L<sub>3</sub>-SOD3-72P and mutants**

| Cys residues reacting<br>with DTNB | Se-<br>hGPx4 <sub>UAG</sub> | Se-hGPx4 <sub>UAG</sub> -<br>L <sub>3</sub> -SOD3-72P | C10S     | C37S     |
|------------------------------------|-----------------------------|-------------------------------------------------------|----------|----------|
| Theoretical                        | 7                           | 8                                                     | 7        | 7        |
| Detected                           | 7.4±0.2                     | 2.78±0.3                                              | 1.8±0.32 | 2.9±0.29 |

## 2. Supplementary Figures

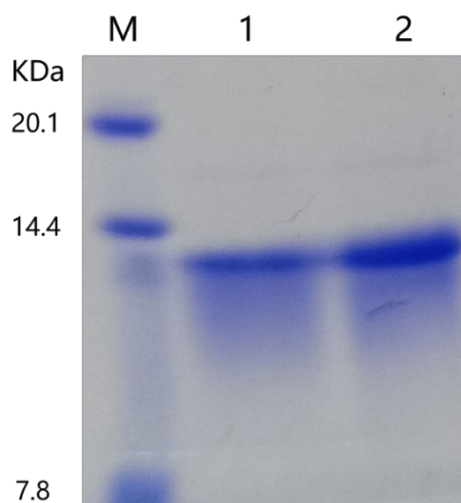

**Figure. S1. SDS-PAGE analysis of SOD3-72P protein.**

M: Marker; 1: reduced SOD3-72P; 2: non-reduced SOD3-72P.

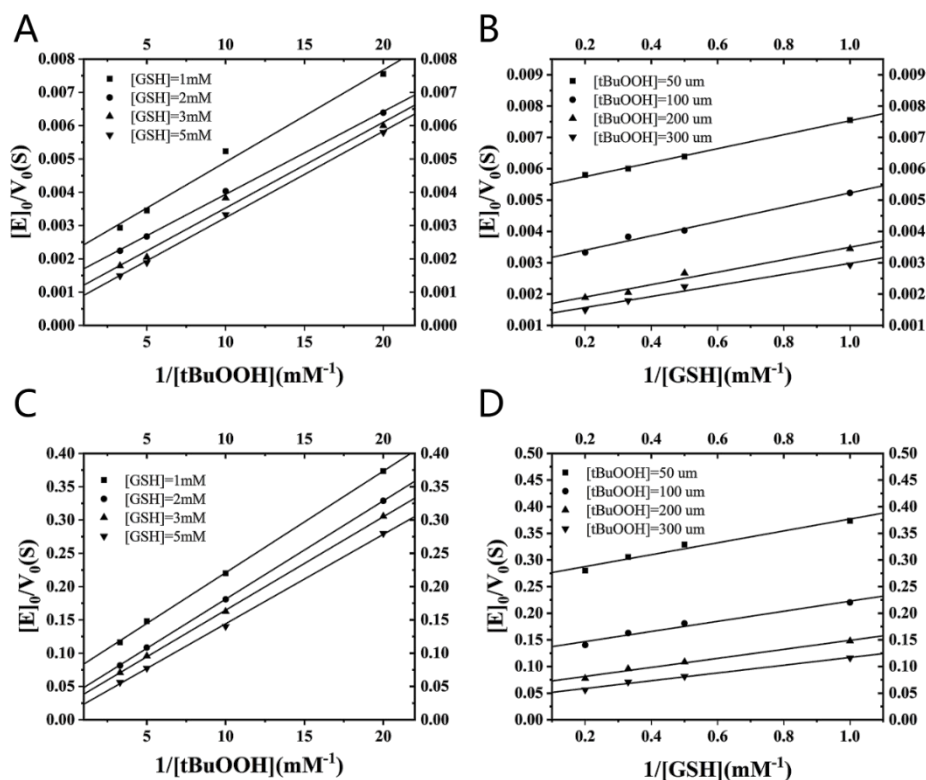

**Figure. S2.** (A)(C)  $[E]_0/V_0$  versus  $1/[tBuOOH]$  ( $\text{mM}^{-1}$ ) at  $[GSH]=1$  mM (square), 2 mM (circle), 3 mM (triangle), 5 mM (down triangle). (B)(D)  $[E]_0/V_0$  versus  $1/[GSH]$  ( $\text{mM}^{-1}$ ) at  $[tBuOOH]=50\mu\text{M}$  (square),  $100\mu\text{M}$  (circle),  $200\mu\text{M}$  (triangle),  $300\mu\text{M}$  (down triangle).
